# Supplementary material
Source: MDPI journal article supplement (https://www.mdpi.com/2075-163X/10/4/308)

Organy

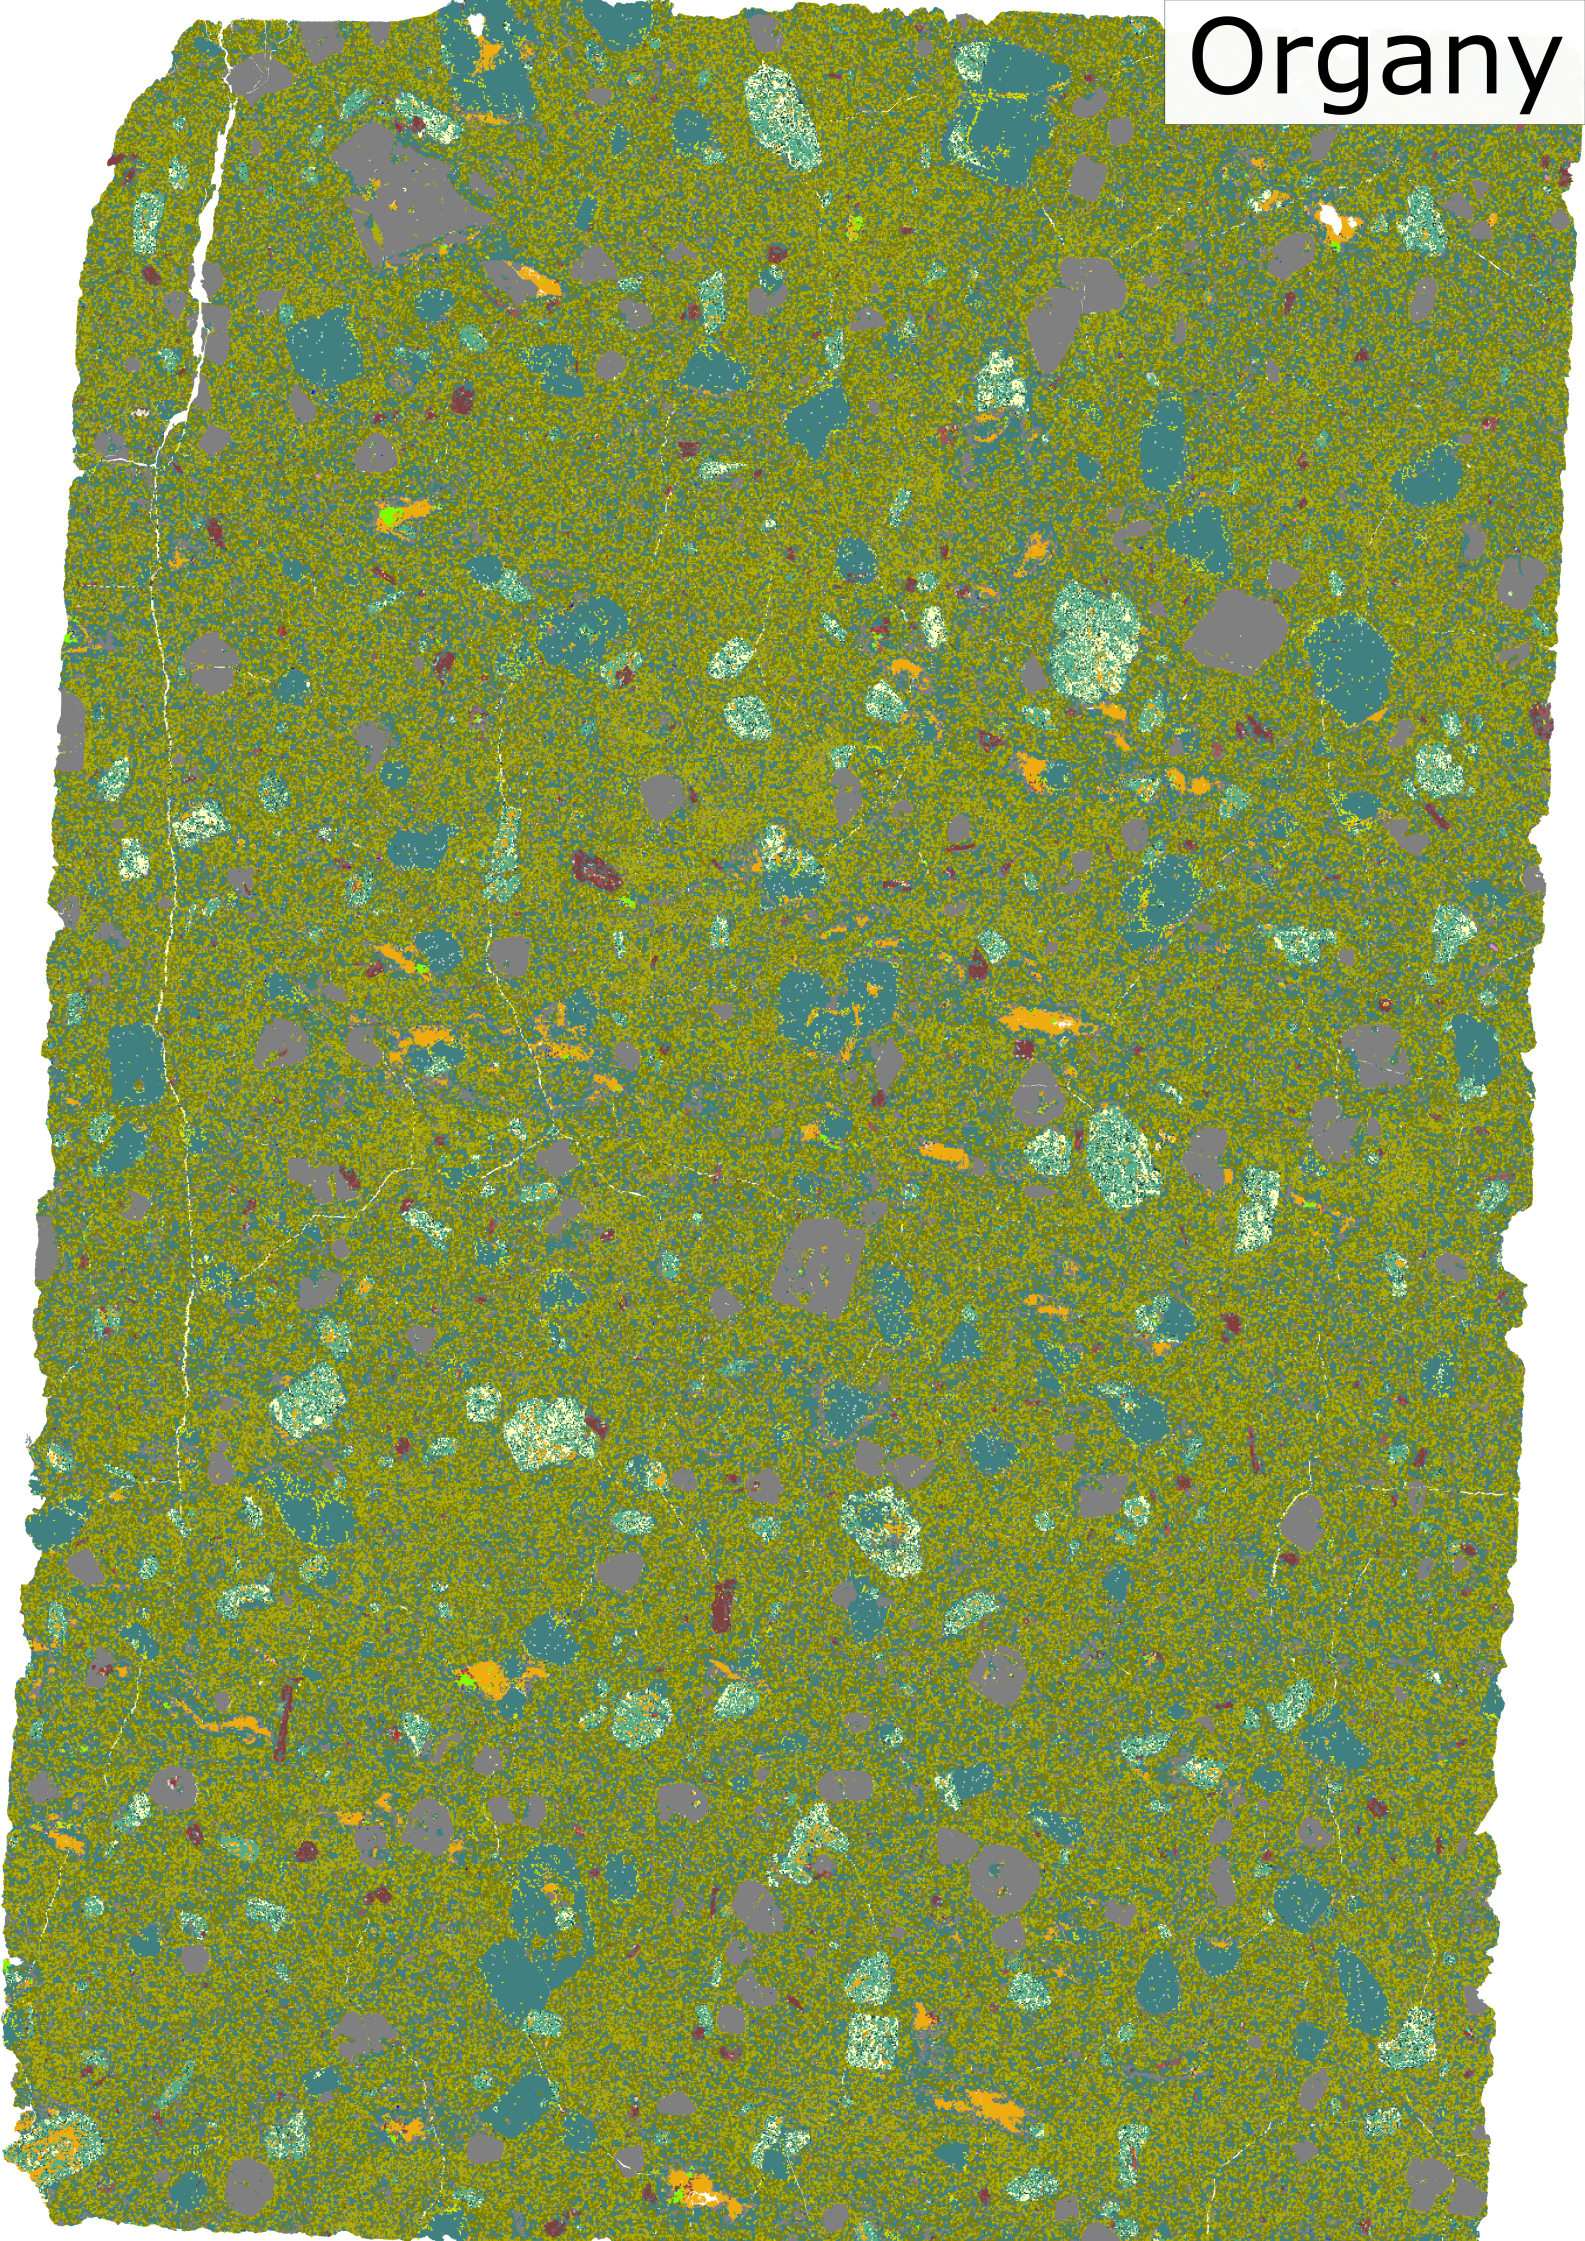



Bieberstein

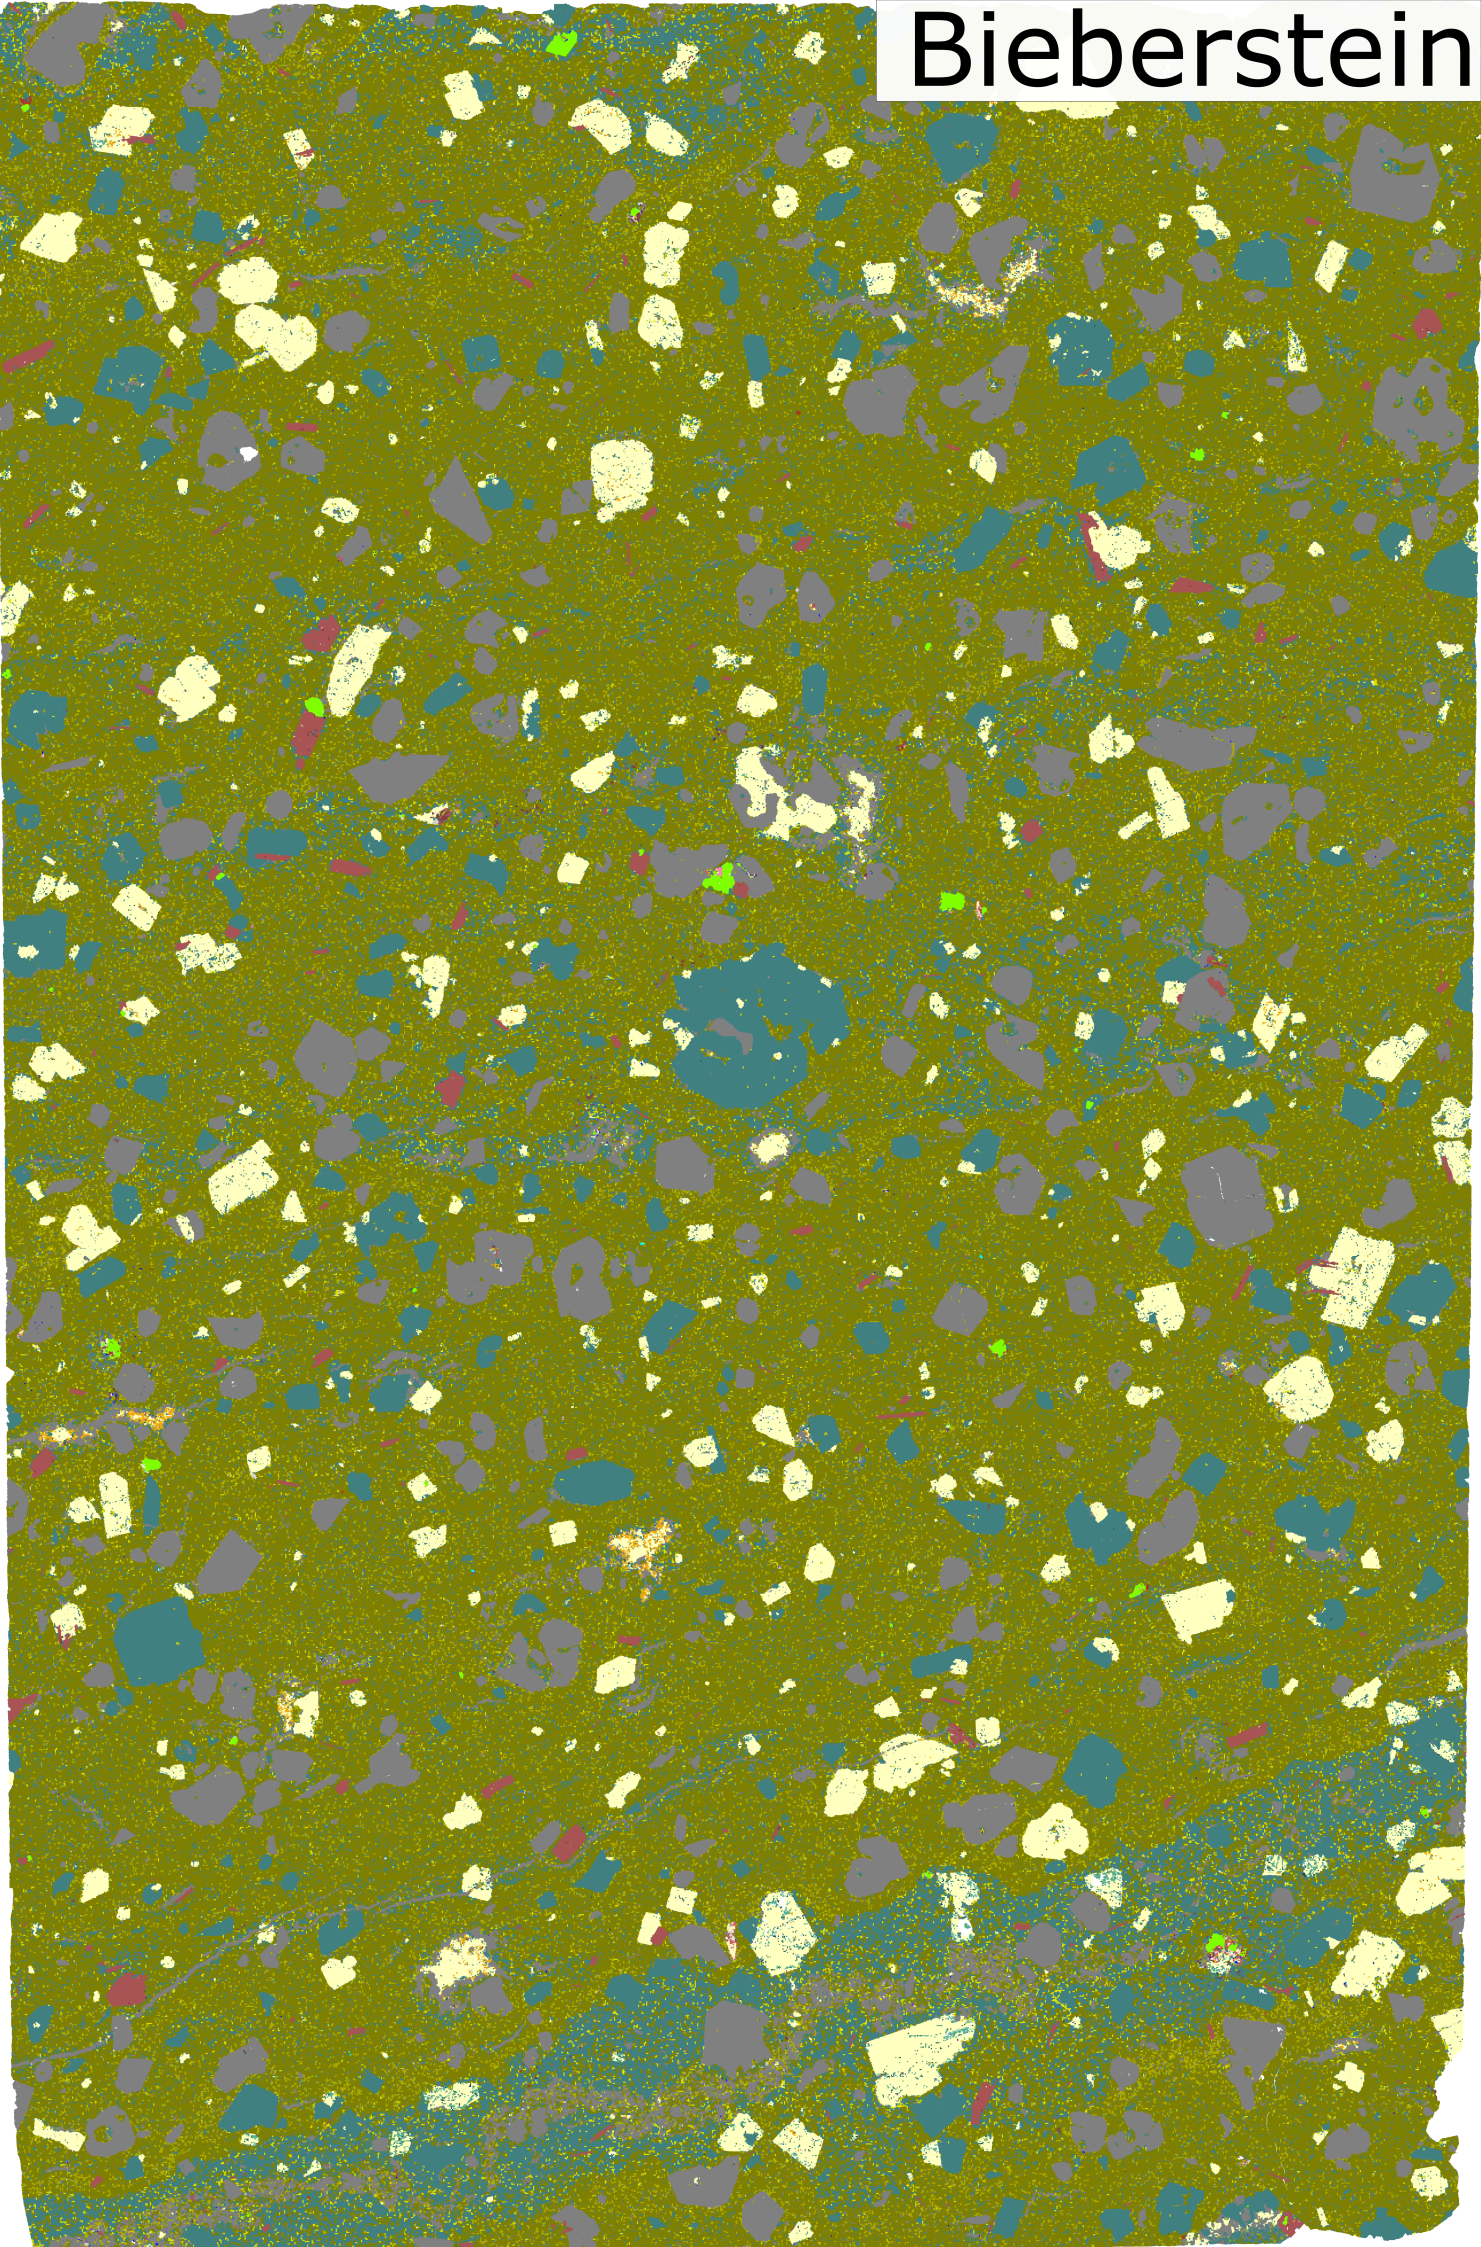



Krucza



Halle

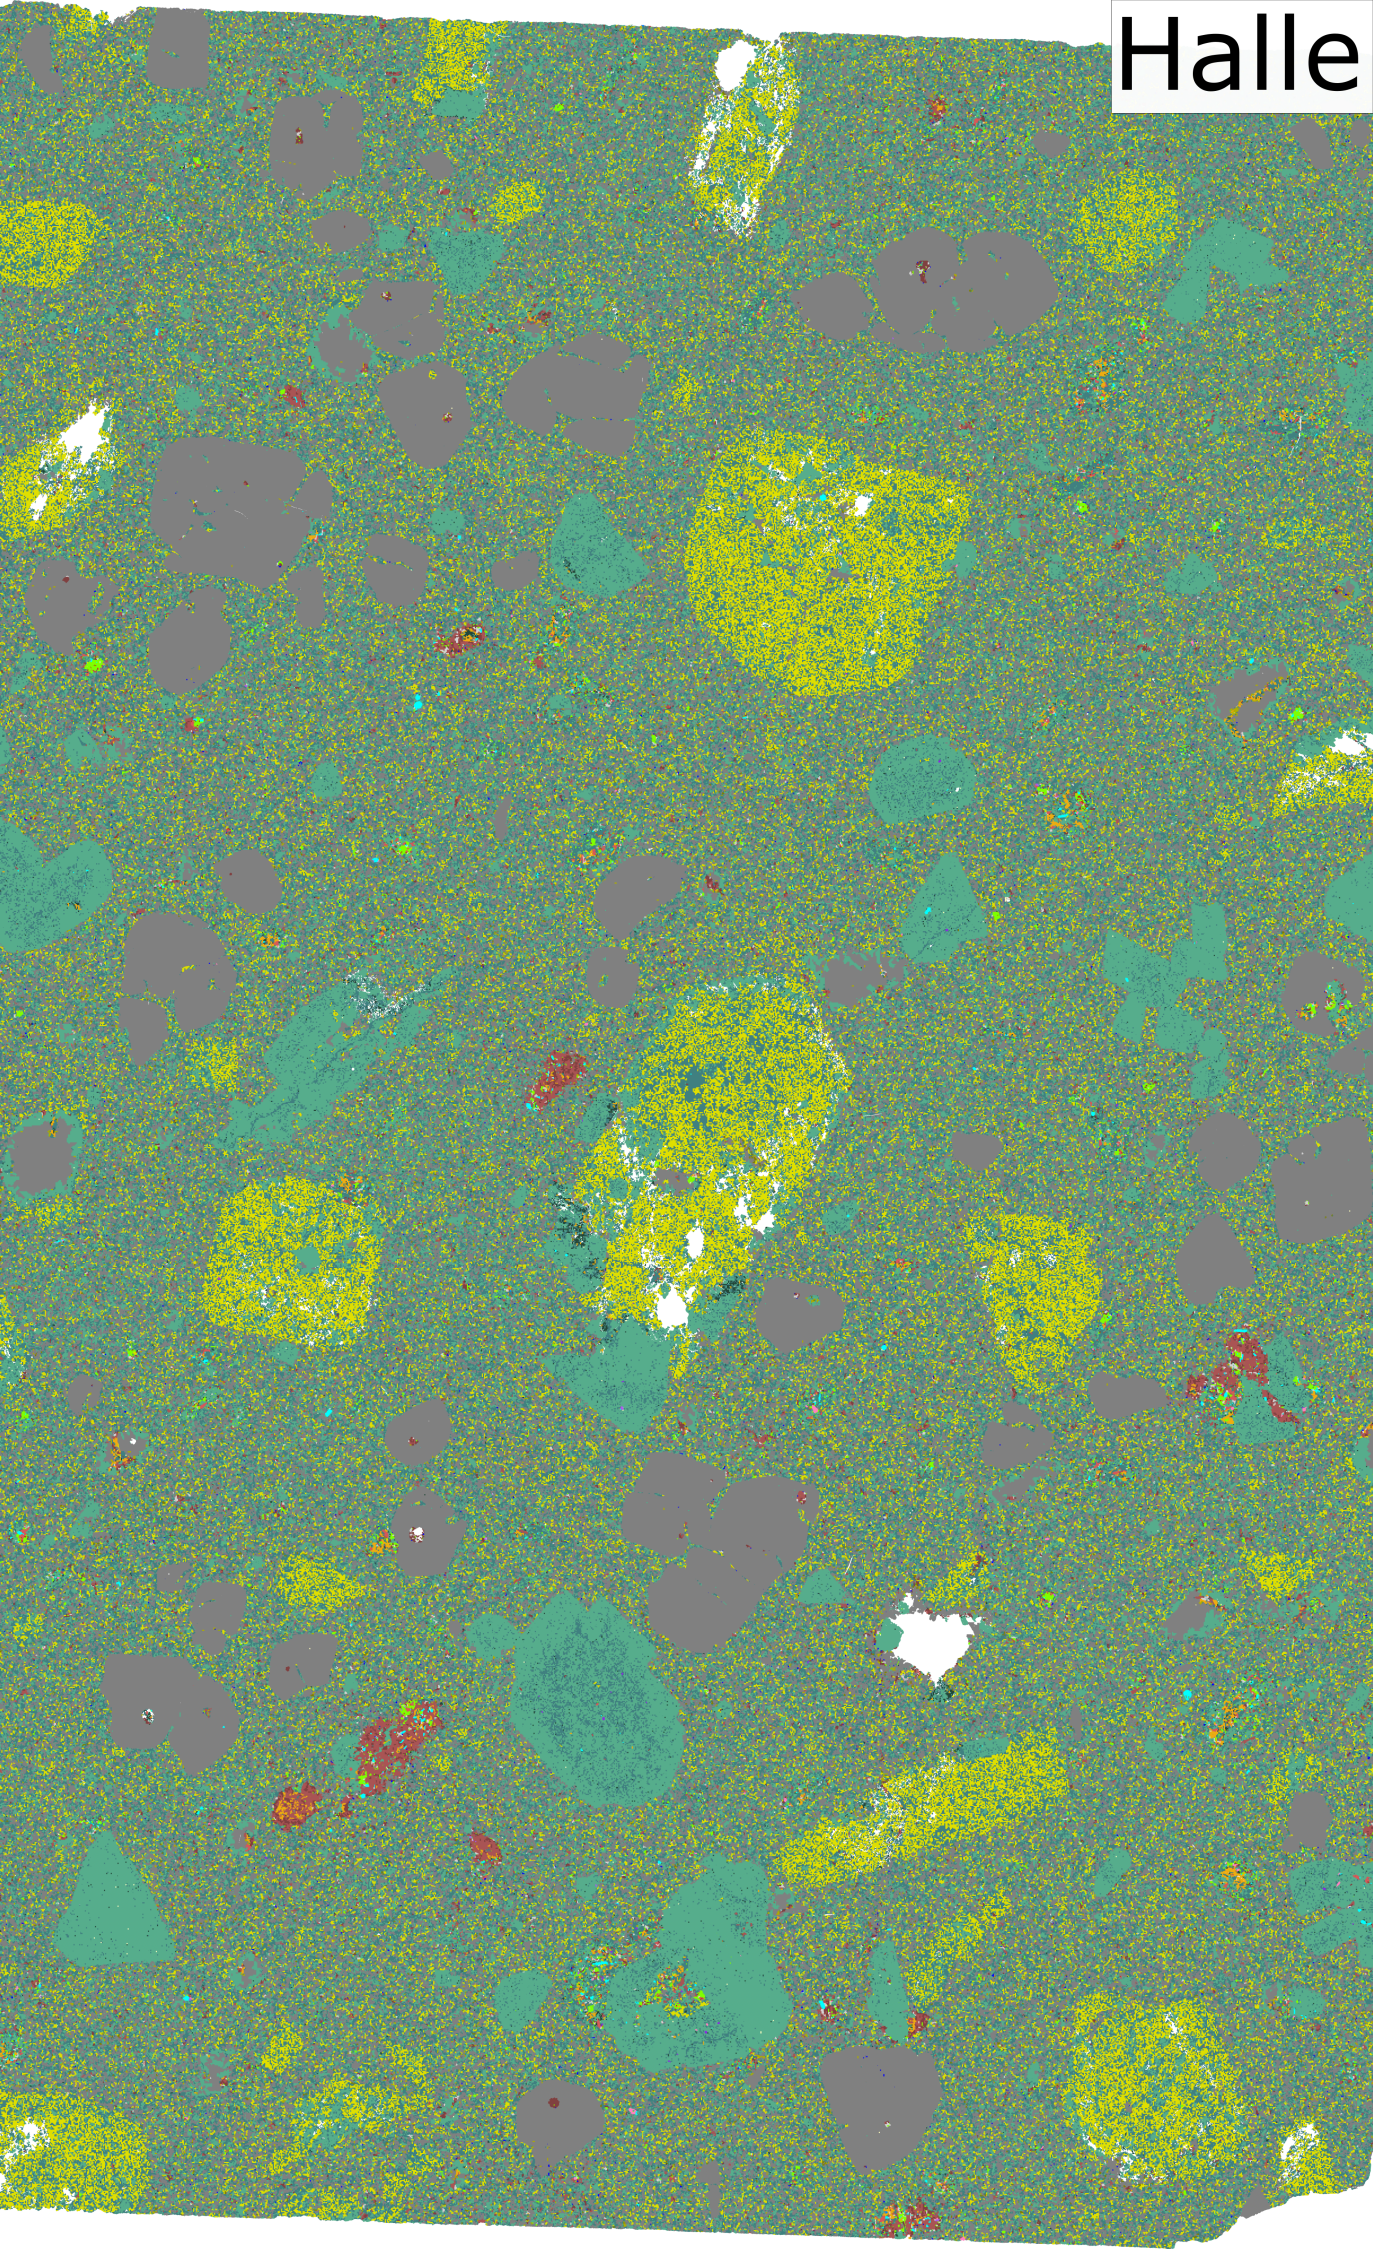



Chemnitz

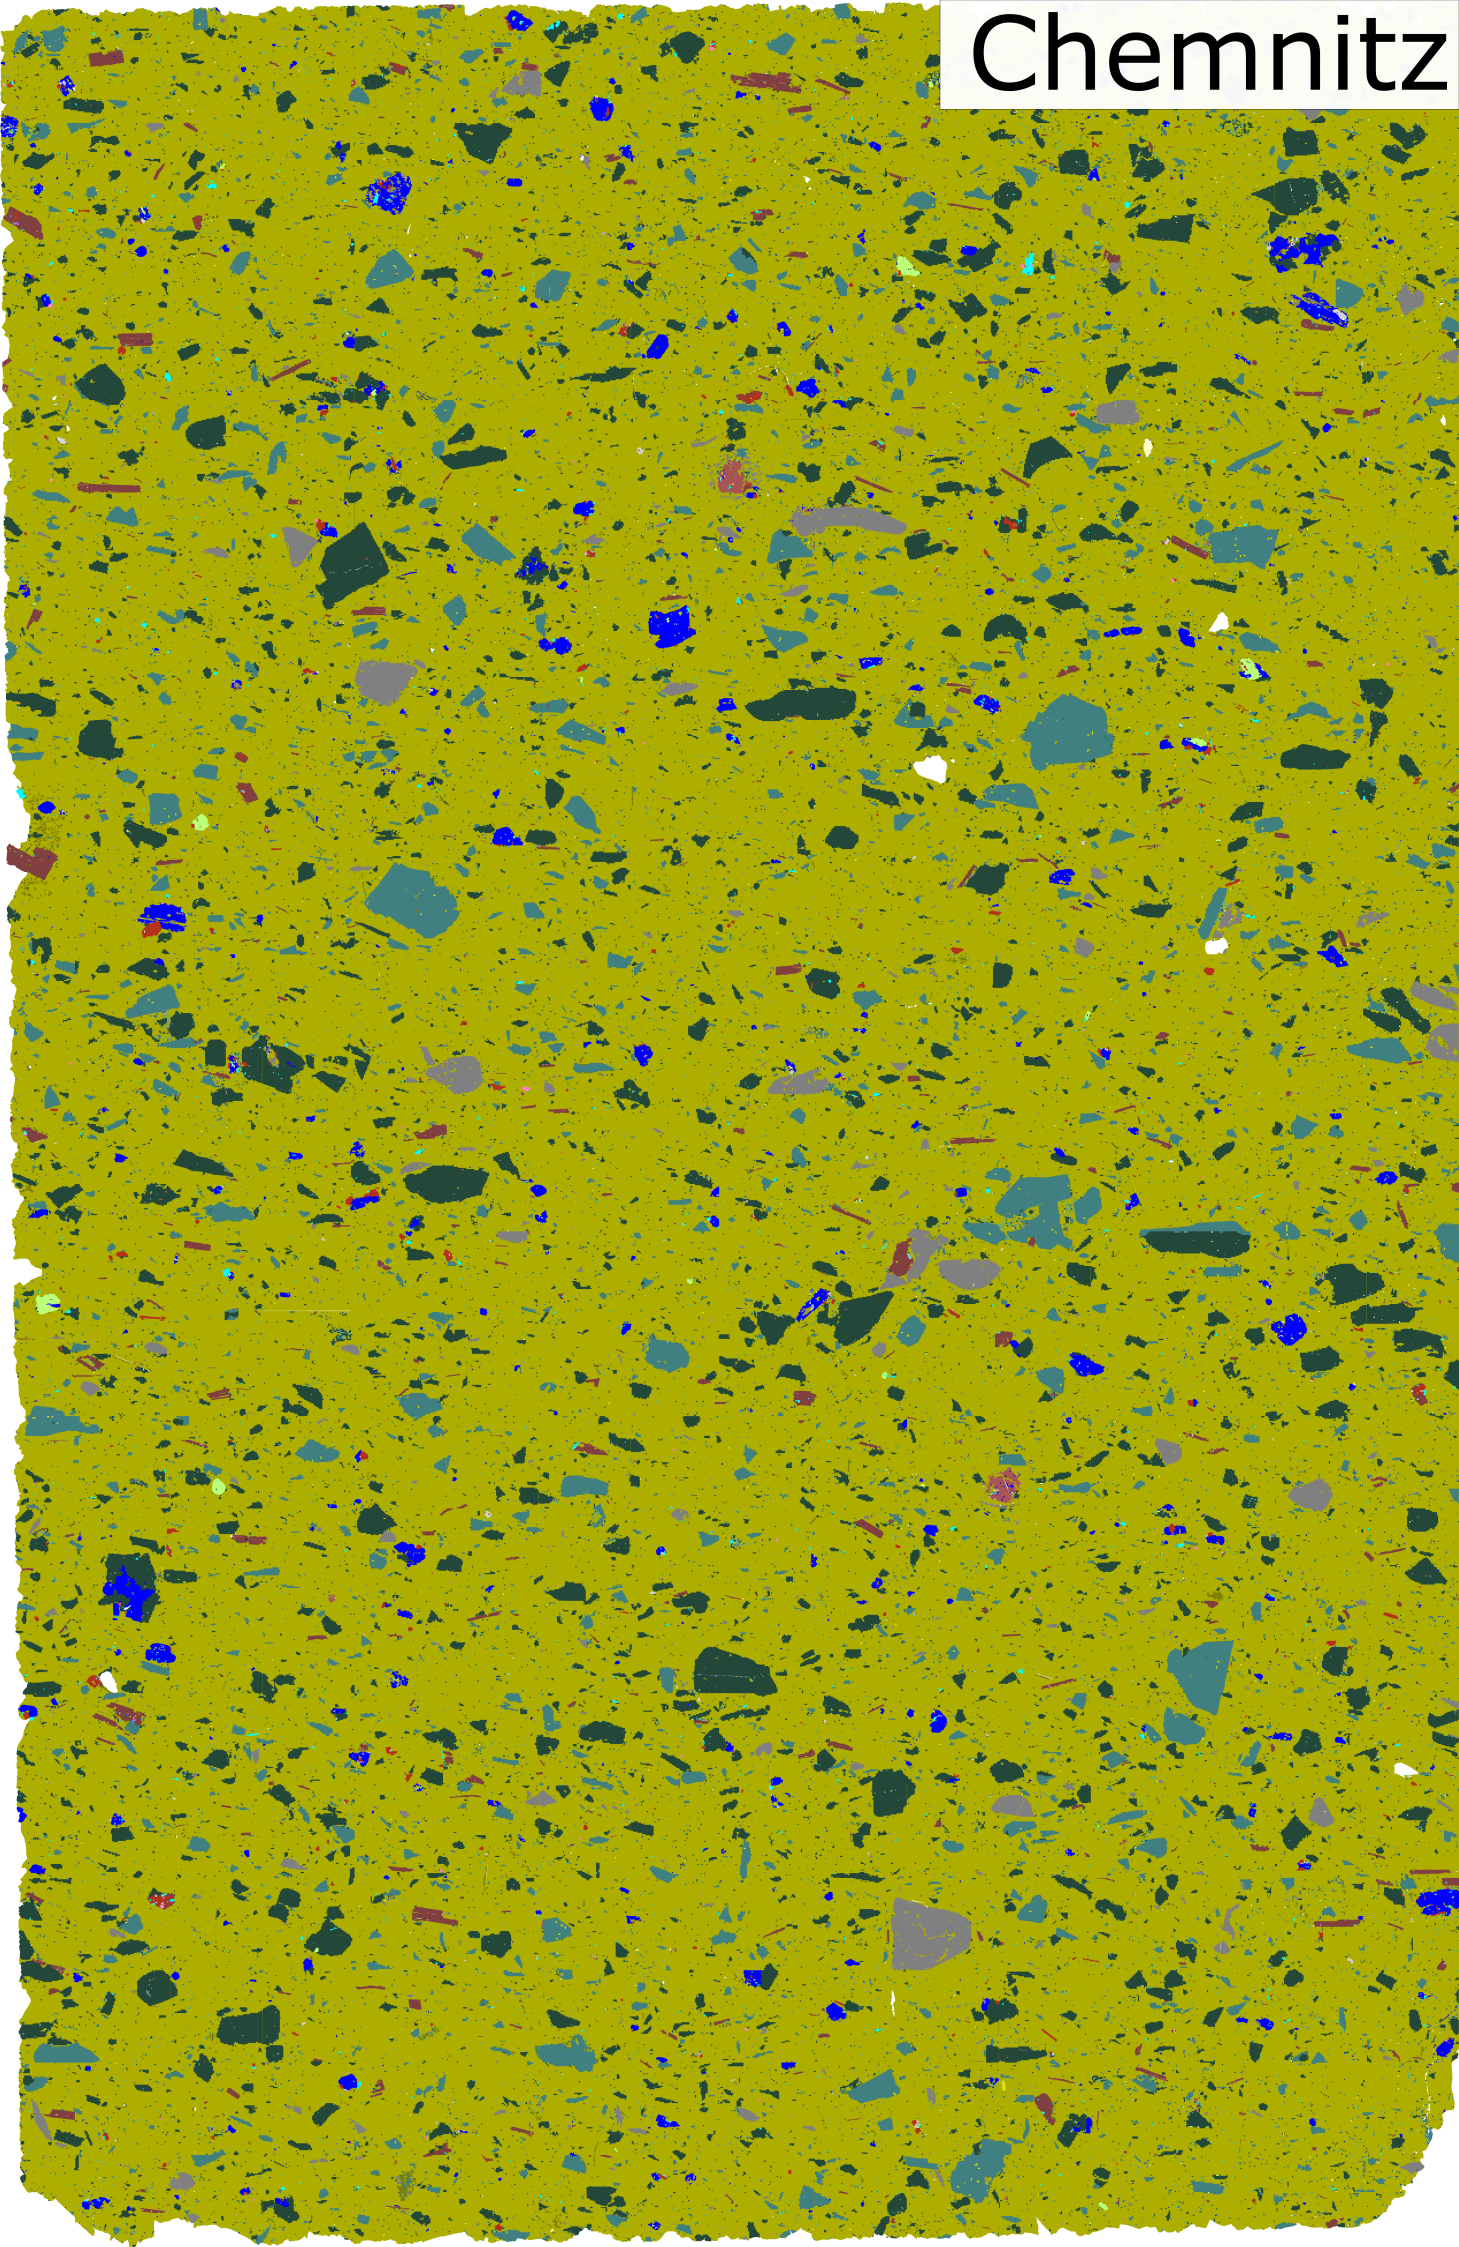

Supplement: s1 [file s1]
